# Supplementary material for: Extracellular Matrix Deposition and Remodeling after Corneal Alkali Burn in Mice
Source: Int J Mol Sci. 2021 May 27;22(11):5708. doi: 10.3390/ijms22115708 (PMC8199272; doi:10.3390/ijms22115708)
Supplement: Supplementary file 1 [file ijms-22-05708-s001.zip › Mutoji et al Supplementary data.pdf]

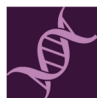

*Supplementary data*

# Extracellular matrix deposition and remodeling after corneal alkali burn in mice

Kazadi N. Mutoji<sup>1</sup>, Mingxia Sun<sup>1</sup>, Garrett Elliott<sup>1</sup>, Isabel Y. Moreno<sup>1</sup>, Clare Hughes<sup>2</sup>, Tarsis F. Gesteira<sup>1,3</sup> and Vivien J. Coulson-Thomas<sup>1,\*</sup>

<sup>1</sup> College of Optometry, University of Houston, Houston, Texas, United States

<sup>2</sup> School of Biosciences, Cardiff University

<sup>3</sup> Optimvia

\* Correspondence: Vivien J. Coulson-Thomas, University of Houston, College of Optometry, 4901 Calhoun Road, Houston, TX 77204-2020, USA; vcoulsonthomas@gmail.com or vjcoulso@central.uh.edu.

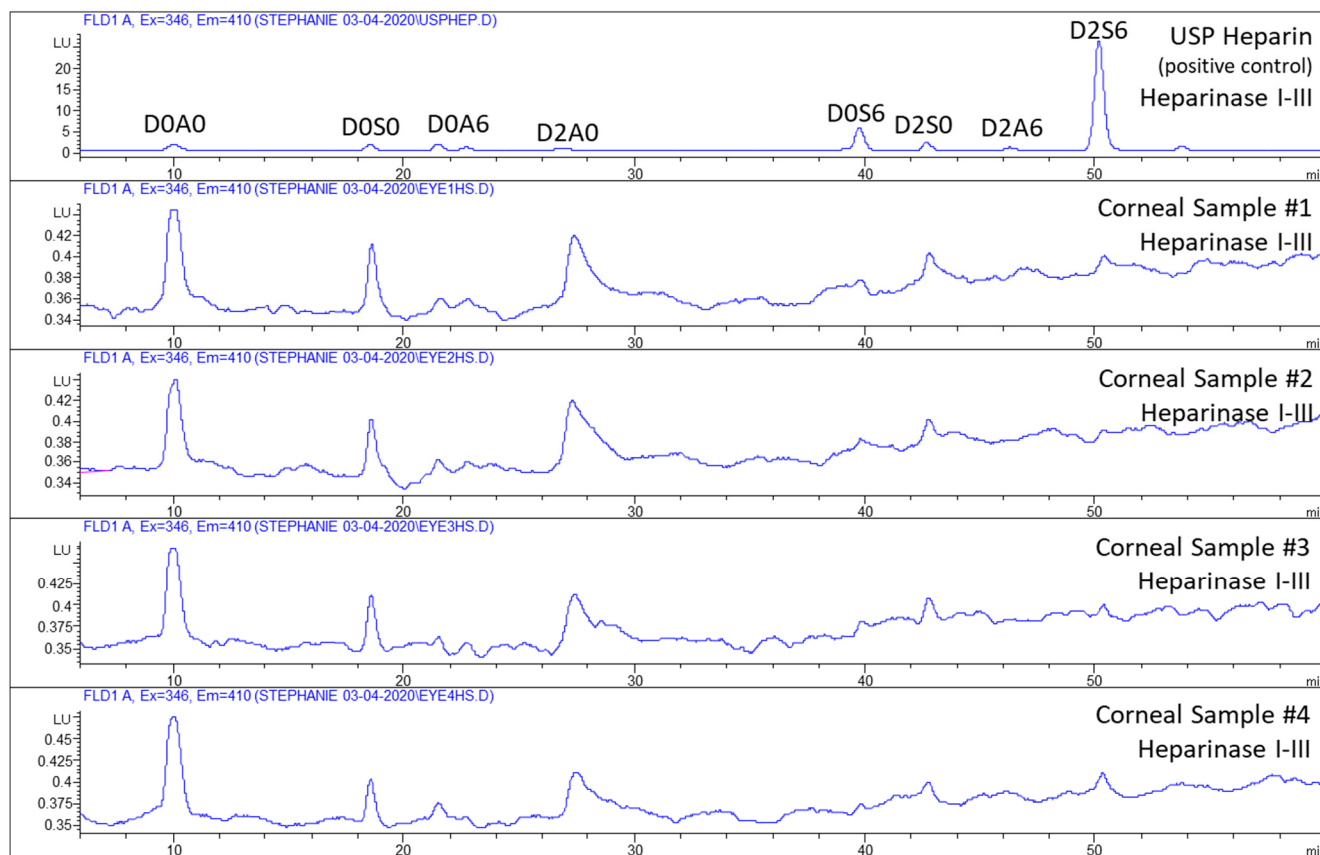

**Supplemental Figure 1.** Chromatogram of HS Standards and Corneal GAG Disaccharides Produced with Heparinase I-III. A representative chromatogram is evidenced for the HS analysis of corneas 5 and 14 days after AB compared to the contralateral control eye. Total GAGs were extracted from corneal tissues and digested with Heparinase I and III in order to generate HS disaccharides. These were then separated by strong anion exchange chromatography using a high pressure liquid chromatography system (SAX-HPLC). The eluent was subjected to fluorescent post-column derivatization. The disaccharide separation profiles were compared to the separation of standard disaccharides for identification and quantification of the different disaccharides in corneal HS (top chromatogram).

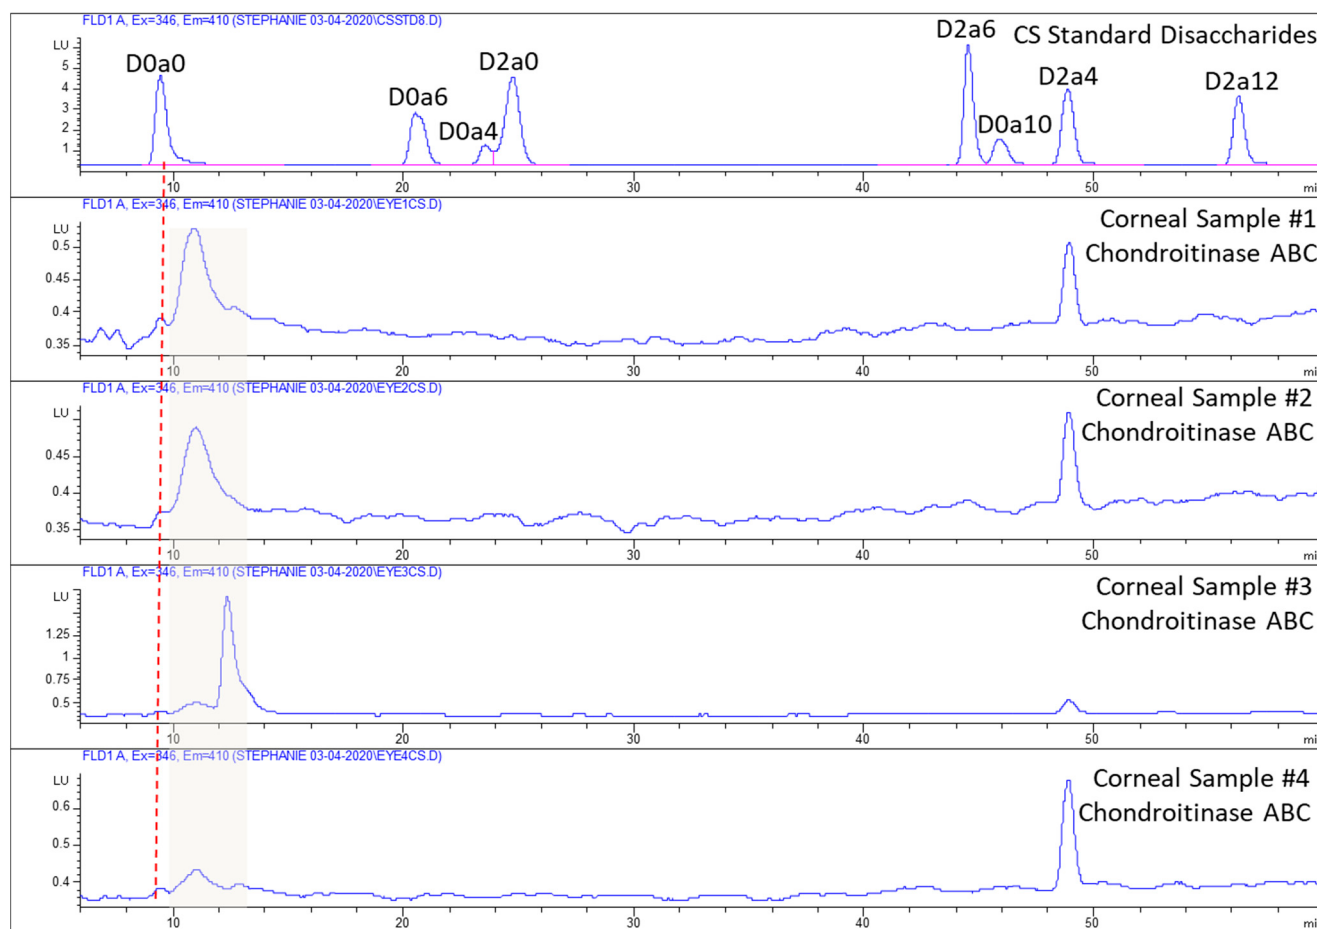

**Supplemental Figure 2.** Chromatogram of CS Standards and Corneal GAG Disaccharides Produced with Chondroitinase ABC. A representative chromatogram is evidenced for CS/DS analysis of corneas 5 and 14 days after AB compared to the contralateral control eye. Total GAGs were extracted from corneal tissues and digested with Chondroitinase ABC in order to generate CS/DS disaccharides. These were then separated by strong anion exchange chromatography using a high pressure liquid chromatography system (SAX-HPLC). The eluent was subjected to fluorescent post-column derivatization. The disaccharide separation profiles were compared to the separation of standard CS disaccharides for identification and quantification of the different disaccharides in corneal CS/DS (top chromatogram).
